# Supplementary material
Source: HighWire-hosted journal article supplement (https://rapm.bmj.com/content/47/10/610)
Supplement: inline-supplementary-material-1 [file inline-supplementary-material-1.pdf]

## NRS Pain score

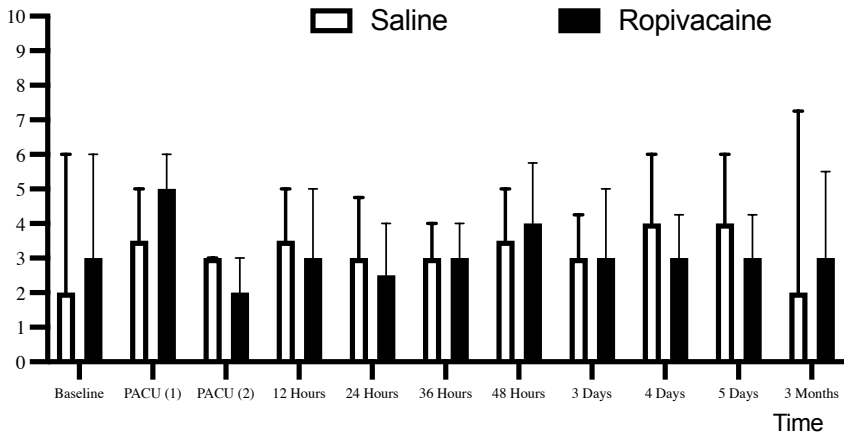

Abbreviations: 1, first evaluation; 2, after morphine titration; NRS, Numerical Rating Scale

Bar represent median and Lines represent IQR

Comparisons by analysis of repeated measures revealed that pain scores during the first postoperative 5 days were statistically similar between groups (*Saline vs Ropivacaine, comparisons by repeated measures: P = 0.47*).
